# Supplementary material
Source: MDPI journal article supplement (https://www.mdpi.com/search?q=molecules-24-03157)
Supplement: s001 [file molecules-24-03157-s001.pdf]

## Supporting Information

# Bioactive Constituents from the Roots of *Eurycoma longifolia*

JingYa Ruan <sup>1,¶</sup>, Zheng Li <sup>1,¶</sup>, Ying Zhang <sup>2</sup>, Yue Chen <sup>2</sup>, Mengyang Liu <sup>2</sup>, Lifeng Han <sup>1</sup>, Yi Zhang <sup>1,2,\*</sup> and Tao Wang <sup>1,2,\*</sup>

<sup>1</sup> Tianjin State Key Laboratory of Modern Chinese Medicine, 312 Anshanxi Road, Nankai District, Tianjin 300193, China; Ruanjy19930919@163.com (J.R.); wo15510977612@163.com (Z.L.); hanlifeng\_1@sohu.com (L.H.)

<sup>2</sup> Tianjin Key Laboratory of TCM Chemistry and Analysis, Institute of Traditional Chinese Medicine, Tianjin University of Traditional Chinese Medicine, 312 Anshanxi Road, Nankai District, Tianjin 300193, China; zyingtzy@163.com (Y.Z.); YueChen17208@gmail.com (Y.C.); liumengyang0212@tjutcm.edu.cn (M.L.)

¶ J. Ruan and Z. Li contributed equally to this work.

\* Correspondence: zhwwxzh@tjutcm.edu.cn (Y.Z.); wangtao@tjutcm.edu.cn (T.W.); Tel./Fax: +86-22-5959-6168 (T.W.)

|            |                                                                                                   |    |
|------------|---------------------------------------------------------------------------------------------------|----|
| Figure S1  | <sup>1</sup> H NMR (600 MHz, C <sub>5</sub> D <sub>5</sub> N) spectrum of compound 1. ....        | 3  |
| Figure S2  | <sup>13</sup> C NMR (150 MHz, C <sub>5</sub> D <sub>5</sub> N) spectrum of compound 1. ....       | 3  |
| Figure S3  | <sup>1</sup> H <sup>1</sup> H COSY (C <sub>5</sub> D <sub>5</sub> N) spectrum of compound 1. .... | 4  |
| Figure S4  | HSQC (C <sub>5</sub> D <sub>5</sub> N) spectrum of compound 1. ....                               | 4  |
| Figure S5  | HMBC (C <sub>5</sub> D <sub>5</sub> N) spectrum of compound 1. ....                               | 5  |
| Figure S6  | NOESY (C <sub>5</sub> D <sub>5</sub> N) spectrum of compound 1. ....                              | 5  |
| Figure S7  | HRESI-TOF-MS spectrum of compound 1. ....                                                         | 6  |
| Figure S8  | <sup>1</sup> H NMR (500 MHz, C <sub>5</sub> D <sub>5</sub> N) spectrum of compound 2. ....        | 7  |
| Figure S9  | <sup>13</sup> C NMR (125 MHz, C <sub>5</sub> D <sub>5</sub> N) spectrum of compound 2. ....       | 7  |
| Figure S10 | DEPT 135 (C <sub>5</sub> D <sub>5</sub> N) spectrum of compound 2. ....                           | 8  |
| Figure S11 | <sup>1</sup> H <sup>1</sup> H COSY (C <sub>5</sub> D <sub>5</sub> N) spectrum of compound 2. .... | 8  |
| Figure S12 | HSQC (C <sub>5</sub> D <sub>5</sub> N) spectrum of compound 2. ....                               | 9  |
| Figure S13 | HMBC (C <sub>5</sub> D <sub>5</sub> N) spectrum of compound 2. ....                               | 9  |
| Figure S14 | HRESI-TOF-MS spectrum of compound 2. ....                                                         | 10 |
| Figure S15 | <sup>1</sup> H NMR (500 MHz, CD <sub>3</sub> OD) spectrum of compound 3. ....                     | 11 |
| Figure S16 | <sup>13</sup> C NMR (125 MHz, CD <sub>3</sub> OD) spectrum of compound 3. ....                    | 11 |
| Figure S17 | DEPT 135 (CD <sub>3</sub> OD) spectrum of compound 3. ....                                        | 12 |
| Figure S18 | <sup>1</sup> H <sup>1</sup> H COSY (C <sub>5</sub> D <sub>5</sub> N) spectrum of compound 3. .... | 12 |
| Figure S19 | HSQC (C <sub>5</sub> D <sub>5</sub> N) spectrum of compound 3. ....                               | 13 |
| Figure S20 | HMBC (C <sub>5</sub> D <sub>5</sub> N) spectrum of compound 3. ....                               | 13 |
| Figure S21 | HRESI-TOF-MS spectrum of compound 3. ....                                                         | 14 |
| Figure S22 | <sup>1</sup> H NMR (500 MHz, CD <sub>3</sub> OD) spectrum of compound 4. ....                     | 15 |
| Figure S23 | <sup>13</sup> C NMR (125 MHz, CD <sub>3</sub> OD) spectrum of compound 4. ....                    | 15 |
| Figure S24 | DEPT 135 (CD <sub>3</sub> OD) spectrum of compound 4. ....                                        | 16 |
| Figure S25 | <sup>1</sup> H <sup>1</sup> H COSY (CD <sub>3</sub> OD) spectrum of compound 4. ....              | 16 |
| Figure S26 | HSQC (CD <sub>3</sub> OD) spectrum of compound 4. ....                                            | 17 |
| Figure S27 | HMBC (CD <sub>3</sub> OD) spectrum of compound 4. ....                                            | 17 |
| Figure S28 | HRESI-TOF-MS spectrum of compound 4. ....                                                         | 18 |
| Figure S29 | MTT analysis of 1–16 obtained from <i>Cortex Dictamni</i> on RAW264.7 cells. ....                 | 19 |
| Figure S30 | Raw quantification data for figure 6 .....                                                        | 20 |
| Figure S31 | Raw quantification data for figure 7 .....                                                        | 20 |
| Figure S32 | Raw quantification data for figure 8 .....                                                        | 21 |
| Figure S33 | Raw quantification data for figure 9 .....                                                        | 21 |

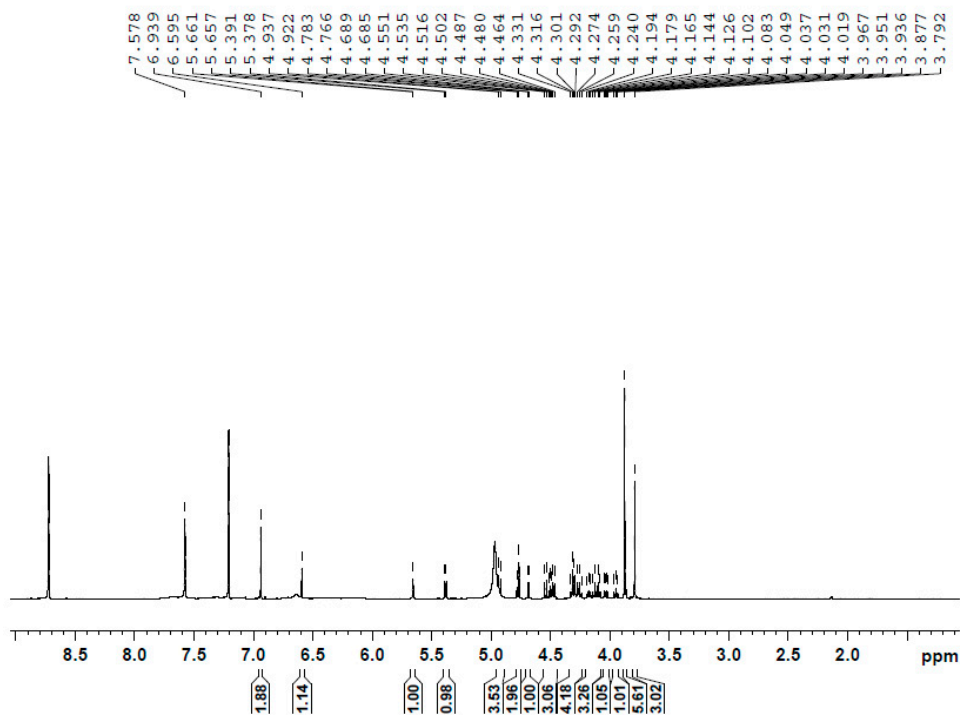Figure S1 <sup>1</sup>H NMR (600 MHz, C<sub>5</sub>D<sub>5</sub>N) spectrum of compound 1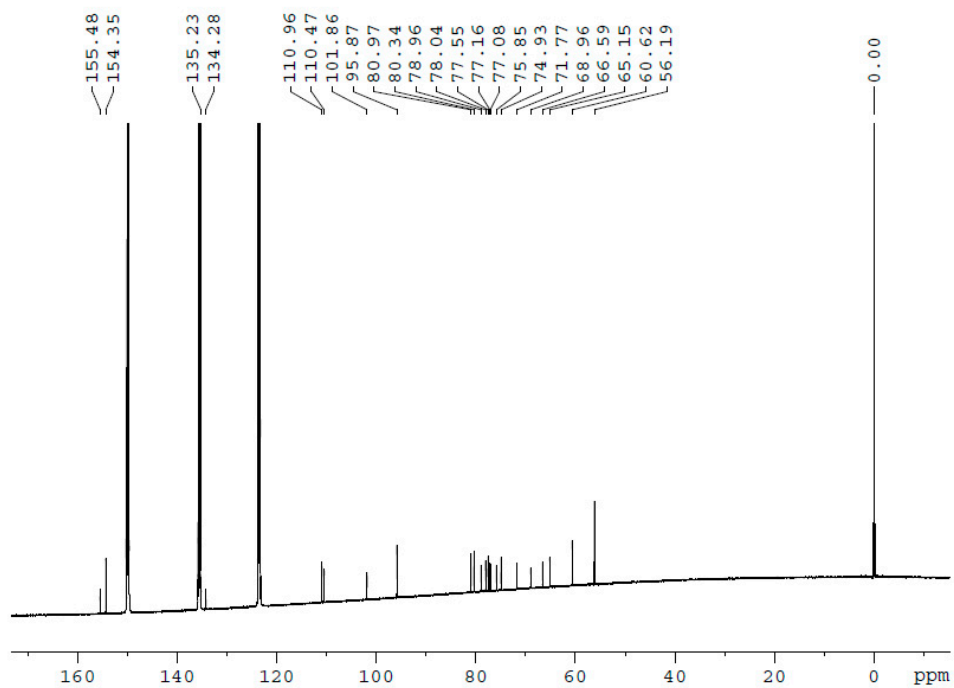Figure S2 <sup>13</sup>C NMR (150 MHz, C<sub>5</sub>D<sub>5</sub>N) spectrum of compound 1

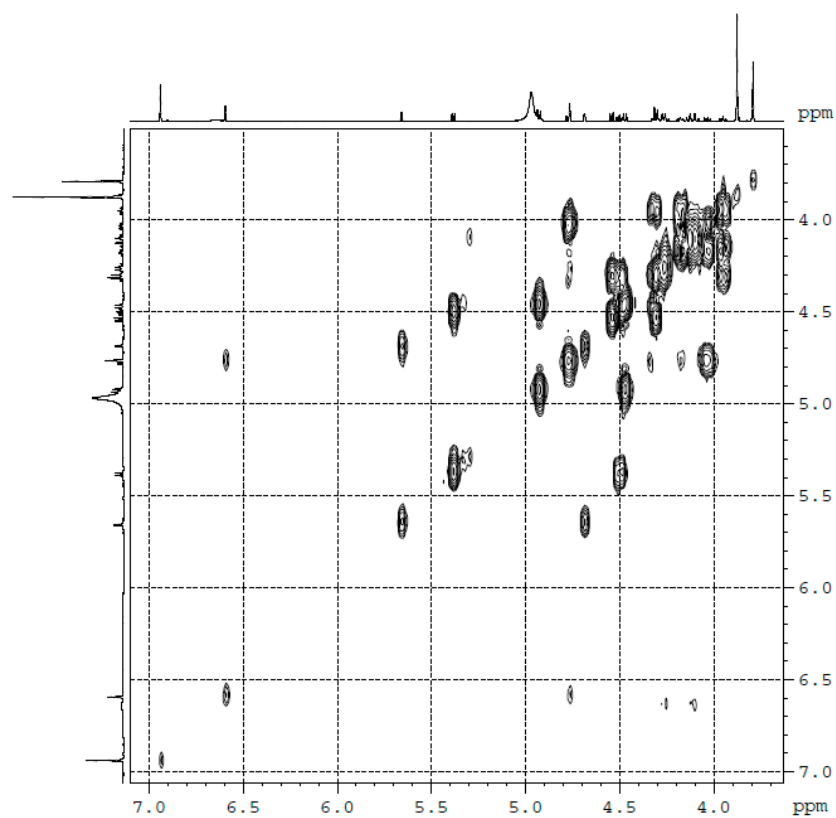

Figure S3  $^1\text{H}$   $^1\text{H}$  COSY ( $\text{C}_5\text{D}_5\text{N}$ ) spectrum of compound 1

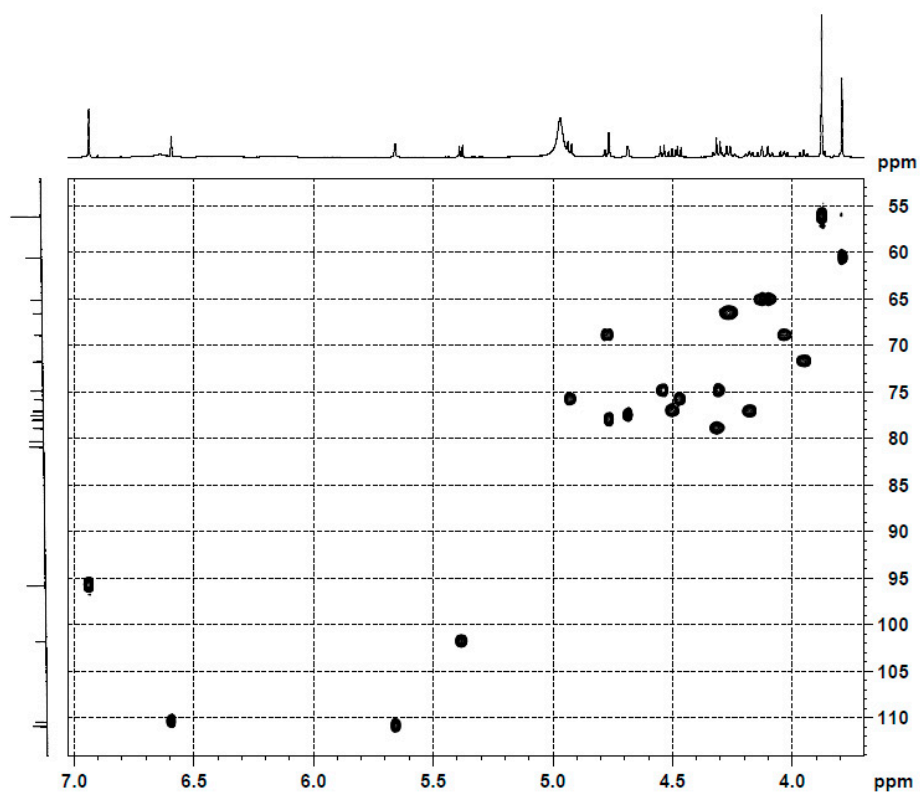

Figure S4 HSQC ( $\text{C}_5\text{D}_5\text{N}$ ) spectrum of compound 1

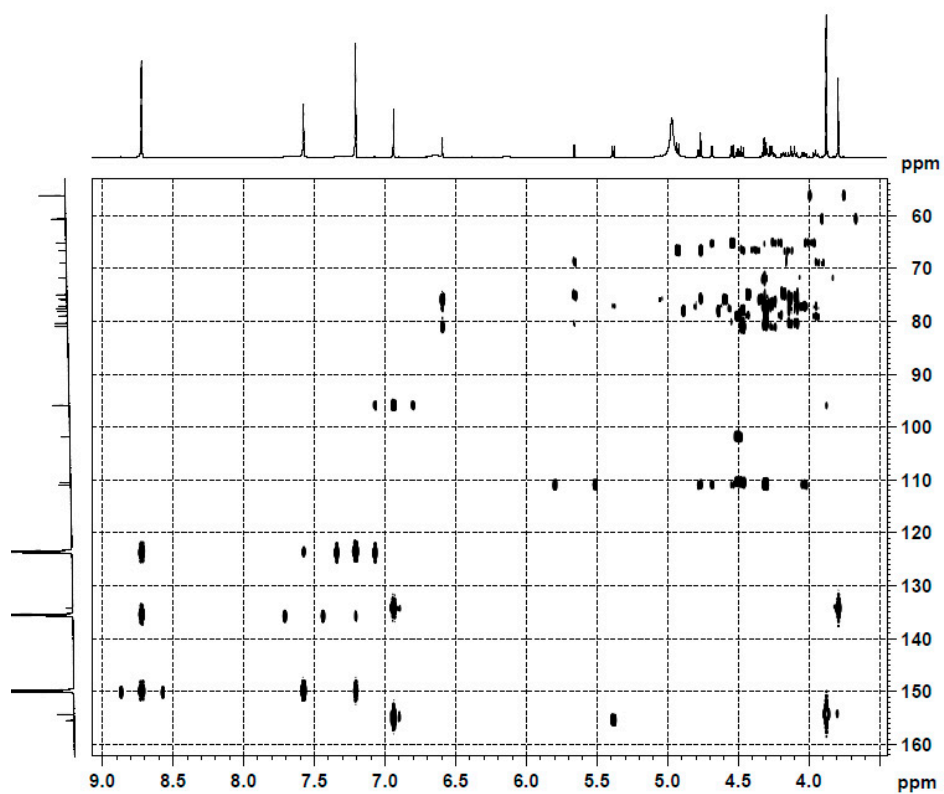

Figure S5 HMBC ( $C_5D_5N$ ) spectrum of compound 1

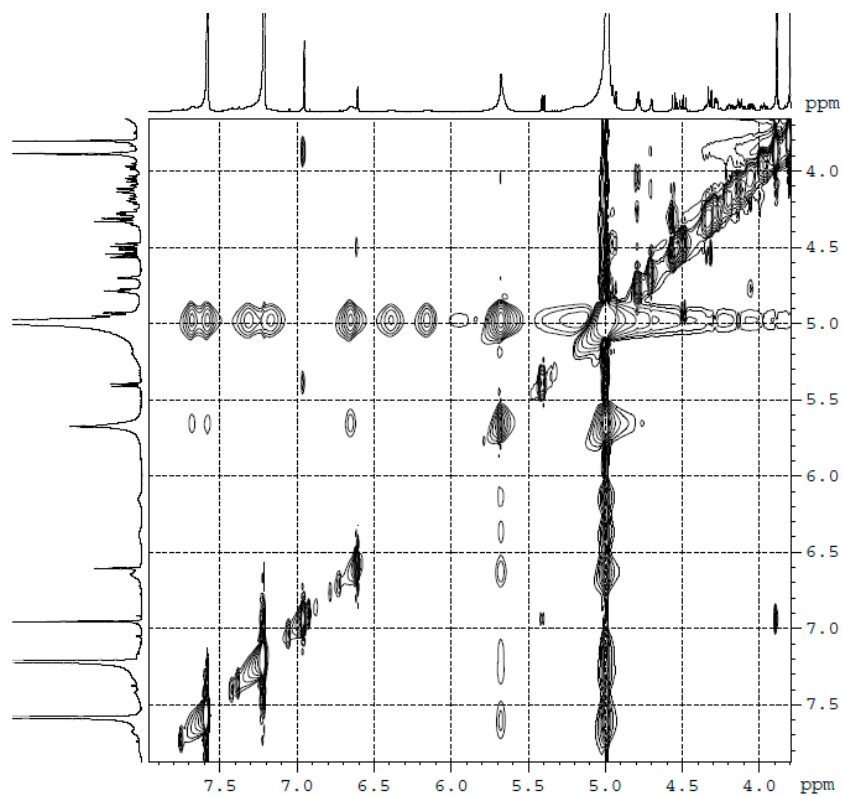

Figure S6 NOESY ( $C_5D_5N$ ) spectrum of compound 1

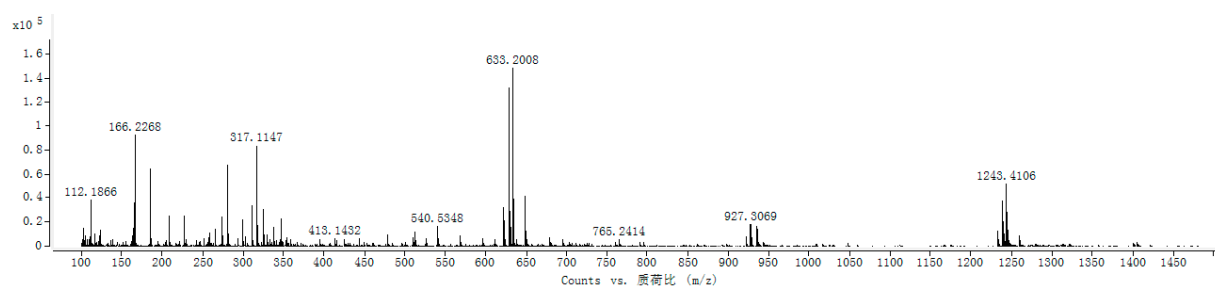

Figure S7 HRESI-TOF-MS spectrum of compound 1

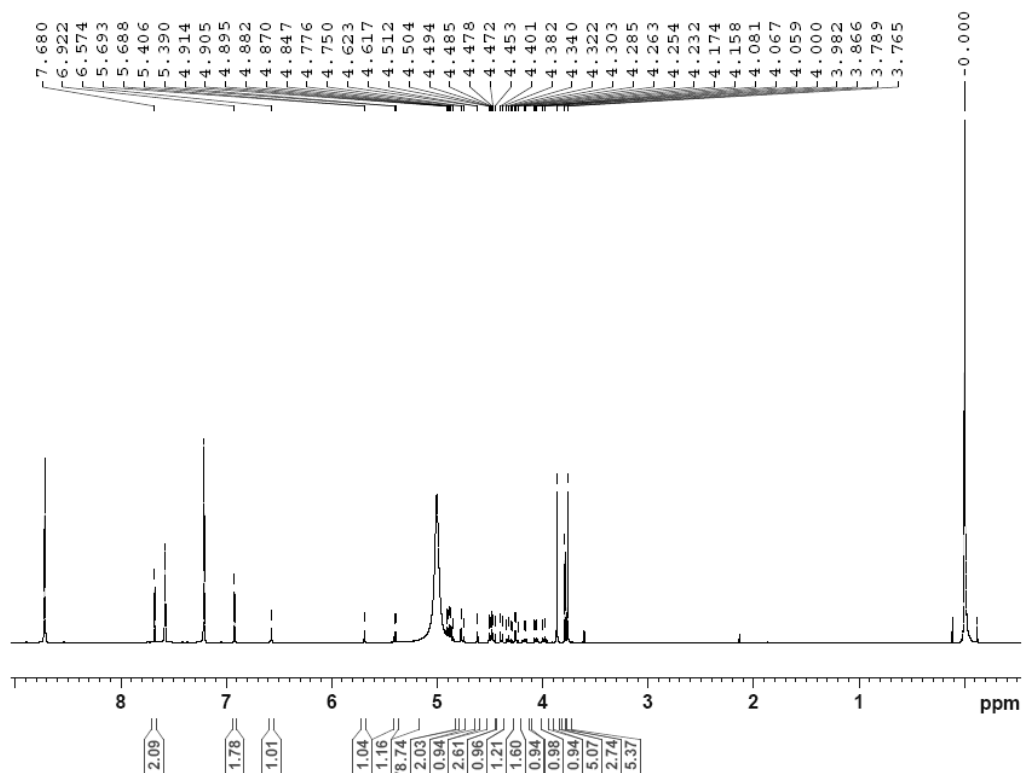Figure S8 <sup>1</sup>H NMR (500 MHz, C<sub>5</sub>D<sub>5</sub>N) spectrum of compound 2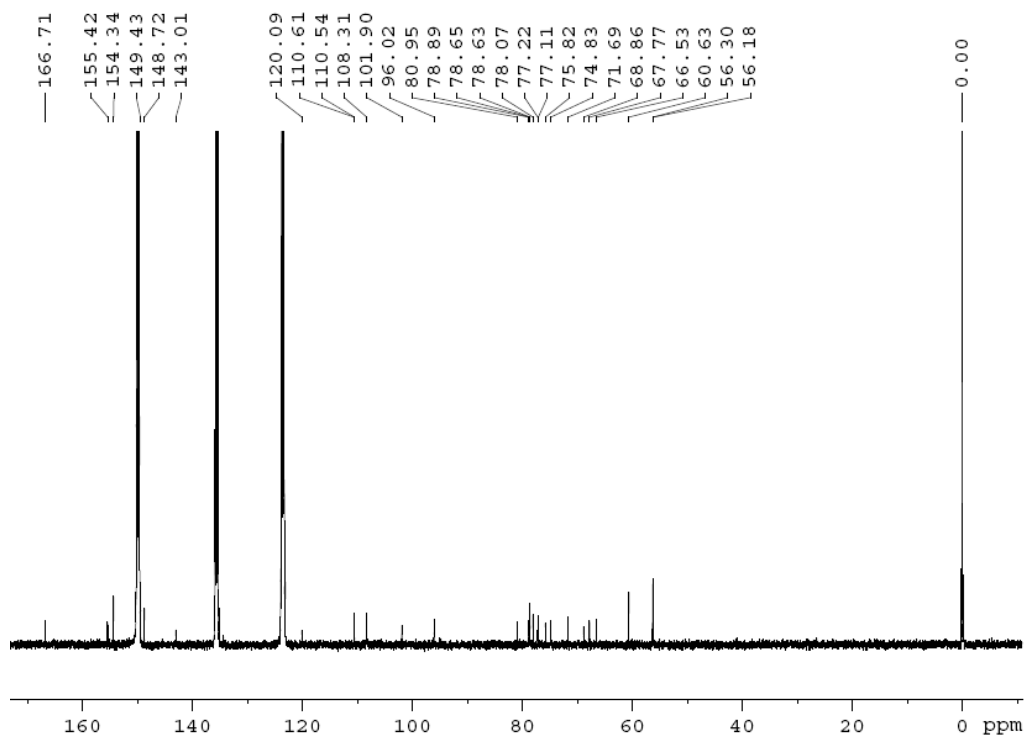Figure S9 <sup>13</sup>C NMR (125 MHz, C<sub>5</sub>D<sub>5</sub>N) spectrum of compound 2

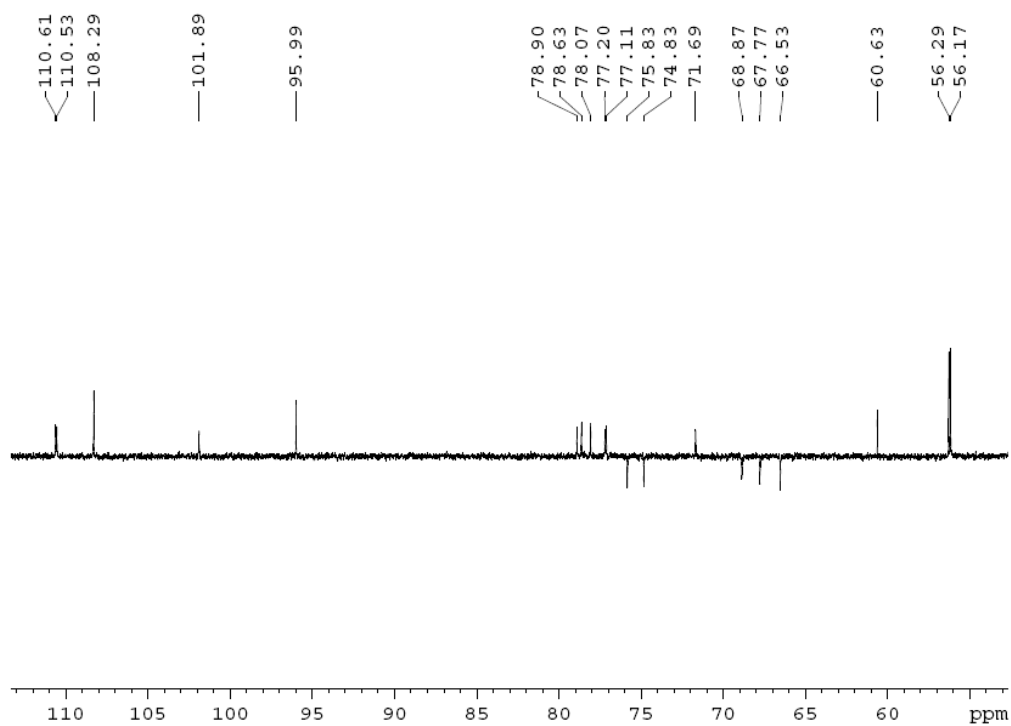

Figure S10 DEPT 135 ( $C_5D_5N$ ) spectrum of compound 2

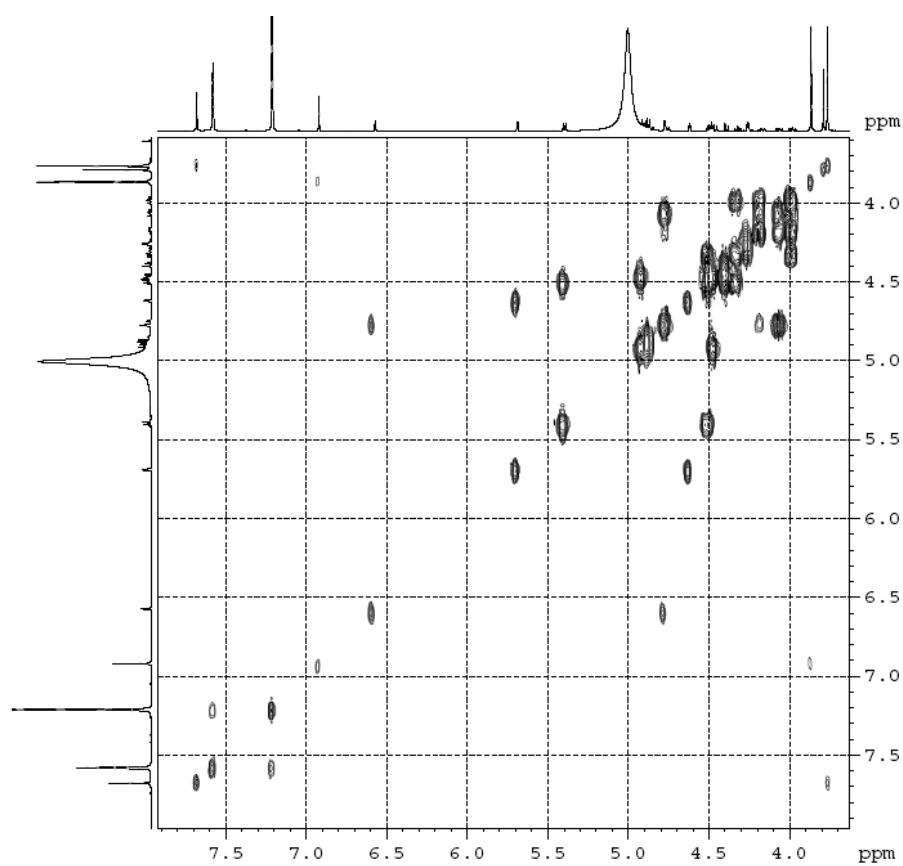

Figure S11  $^1H$ - $^1H$  COSY ( $C_5D_5N$ ) spectrum of compound 2



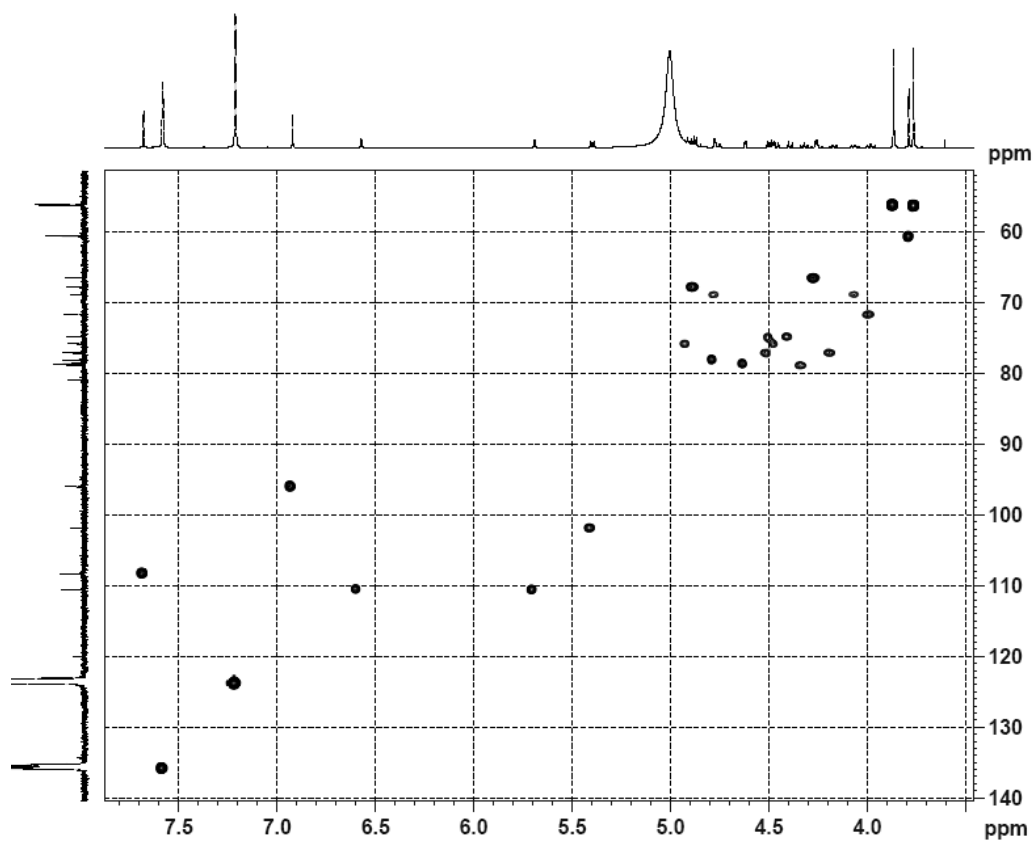Figure S12 HSQC ( $C_5D_5N$ ) spectrum of compound 2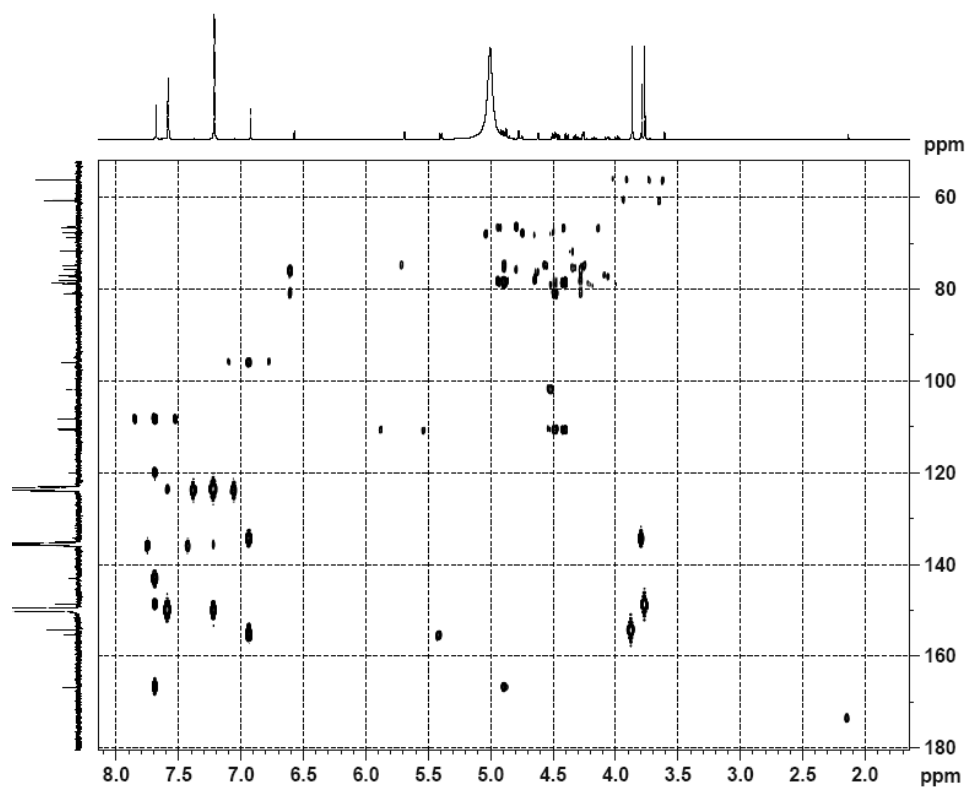

**Figure S13** HMBC ( $C_5D_5N$ ) spectrum of compound 2

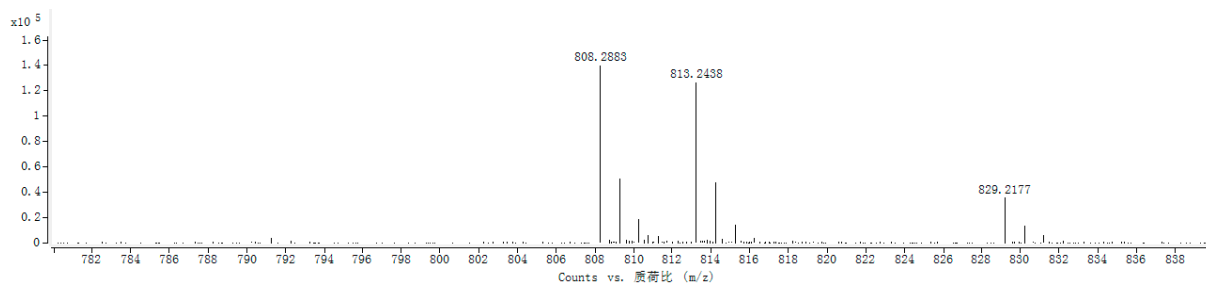

**Figure S14** HRESI-TOF-MS spectrum of compound 2

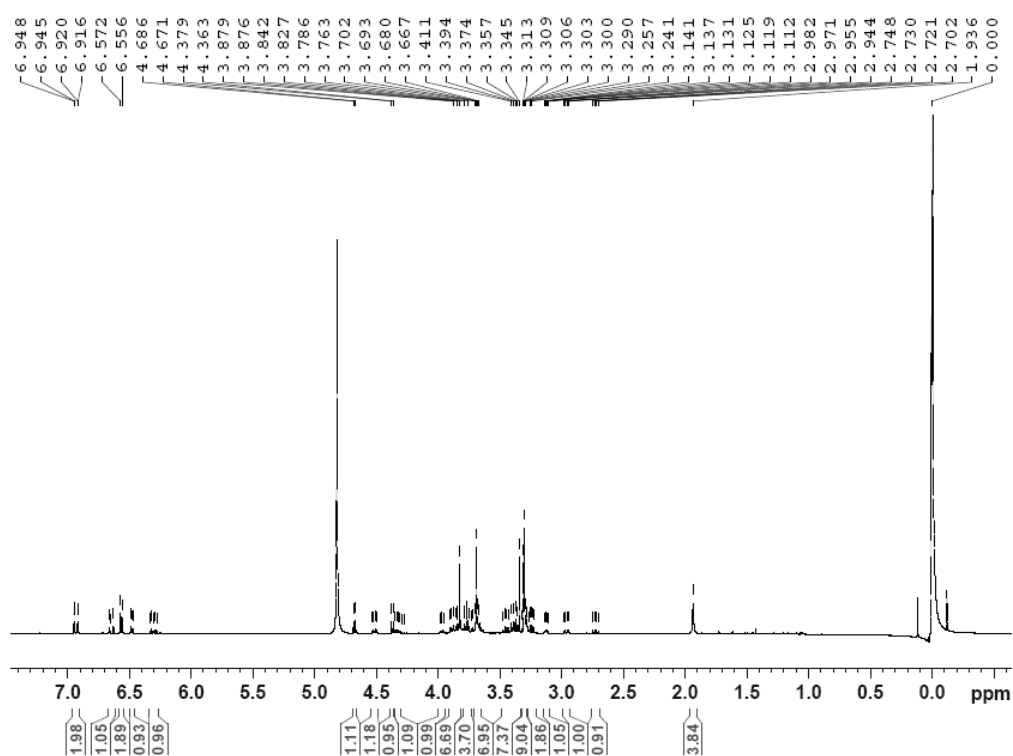

Figure S15  $^1\text{H}$  NMR (500 MHz,  $\text{CD}_3\text{OD}$ ) spectrum of compound 3

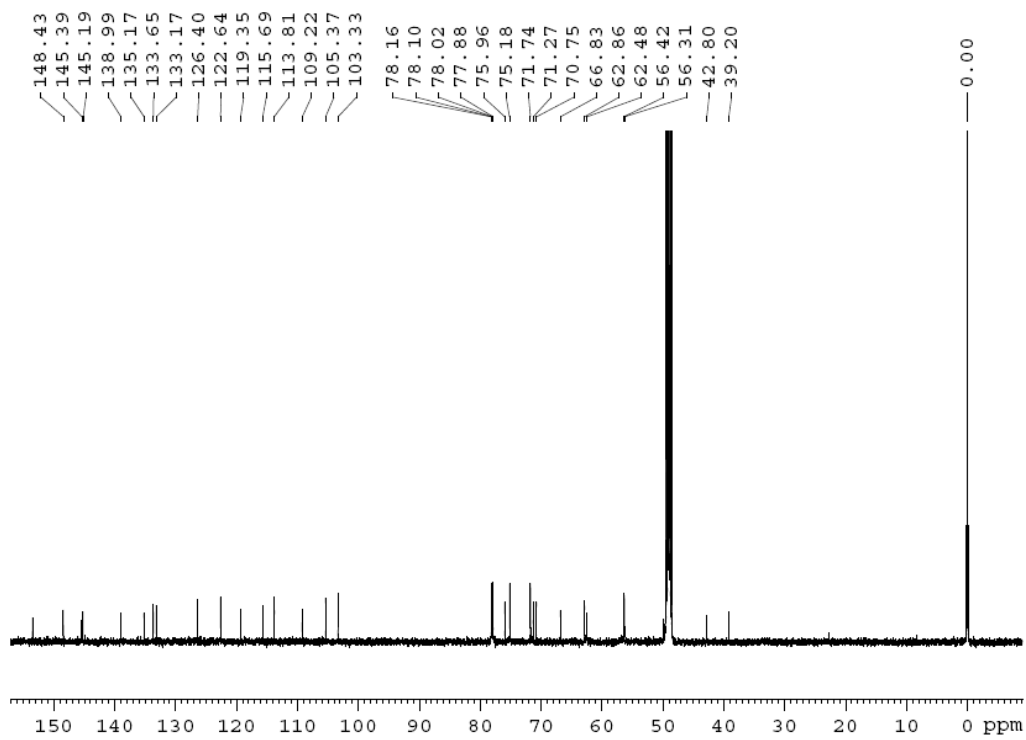

Figure S16  $^{13}\text{C}$  NMR (125 MHz,  $\text{CD}_3\text{OD}$ ) spectrum of compound 3

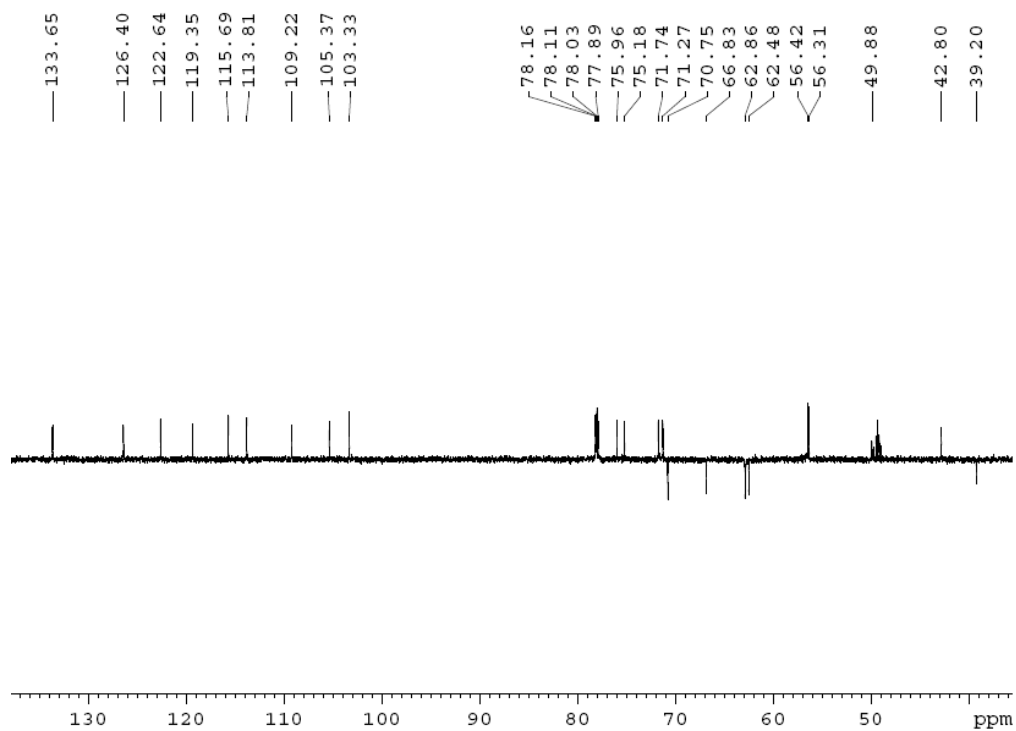Figure S17 DEPT 135 (CD<sub>3</sub>OD) spectrum of compound 3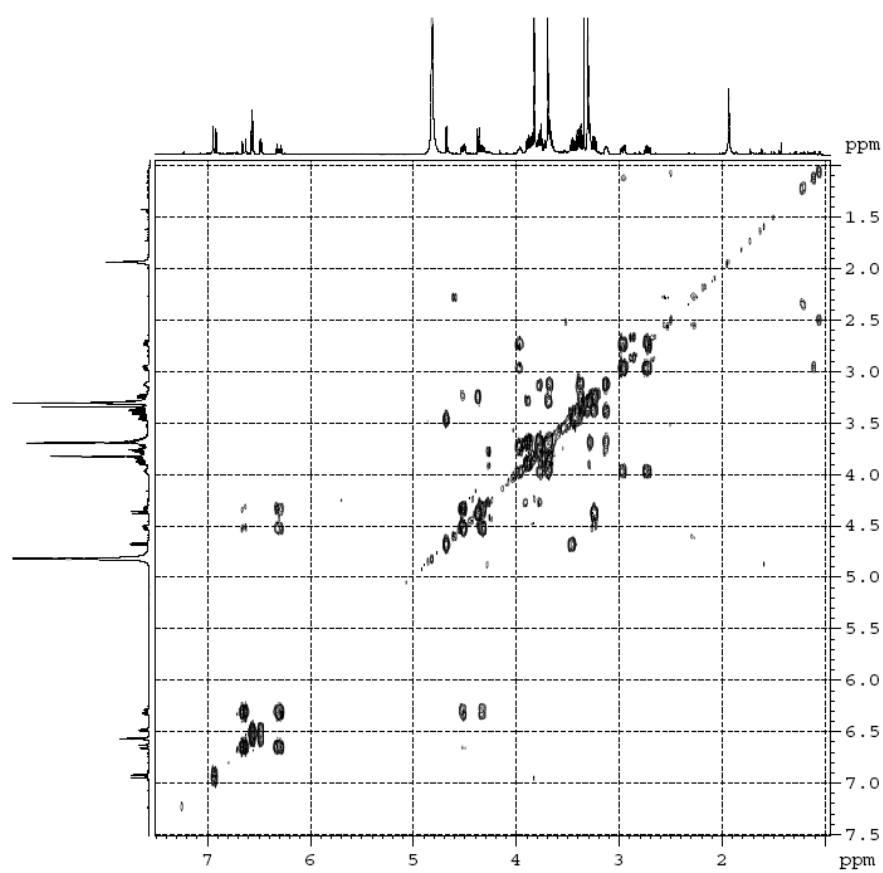

**Figure S18**  $^1\text{H}$   $^1\text{H}$  COSY ( $\text{CD}_3\text{OD}$ ) spectrum of compound 3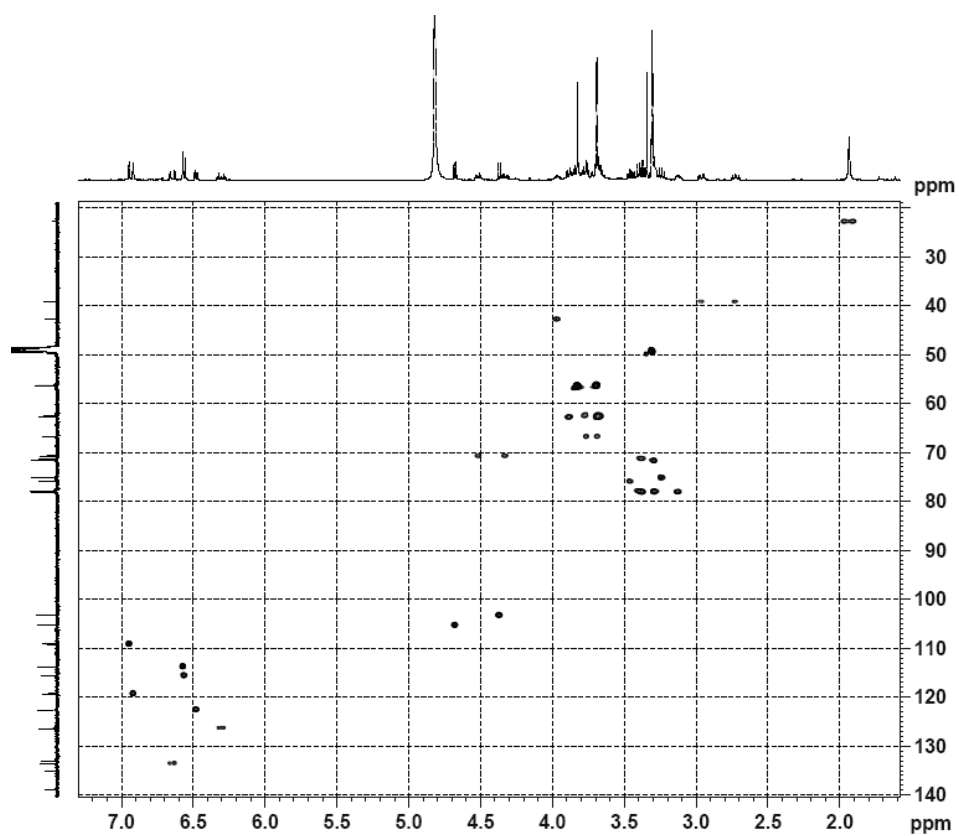**Figure S19** HSQC ( $\text{CD}_3\text{OD}$ ) spectrum of compound 3

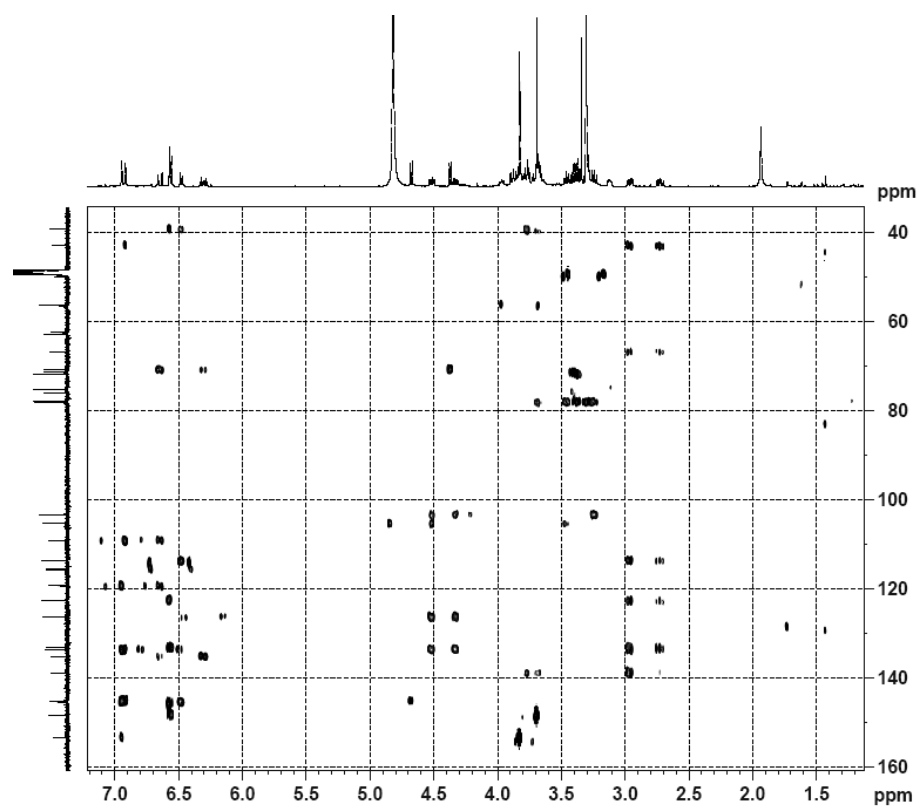

Figure S20 HMBC (CD<sub>3</sub>OD) spectrum of compound 3

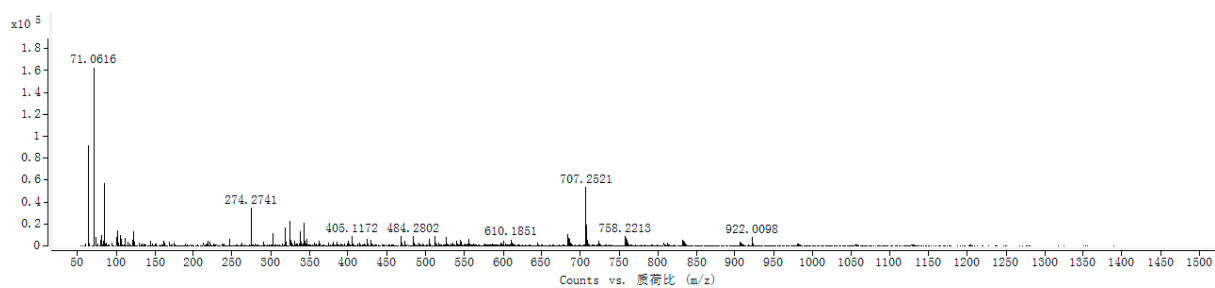

Figure S21 HRESI-TOF-MS spectrum of compound 3

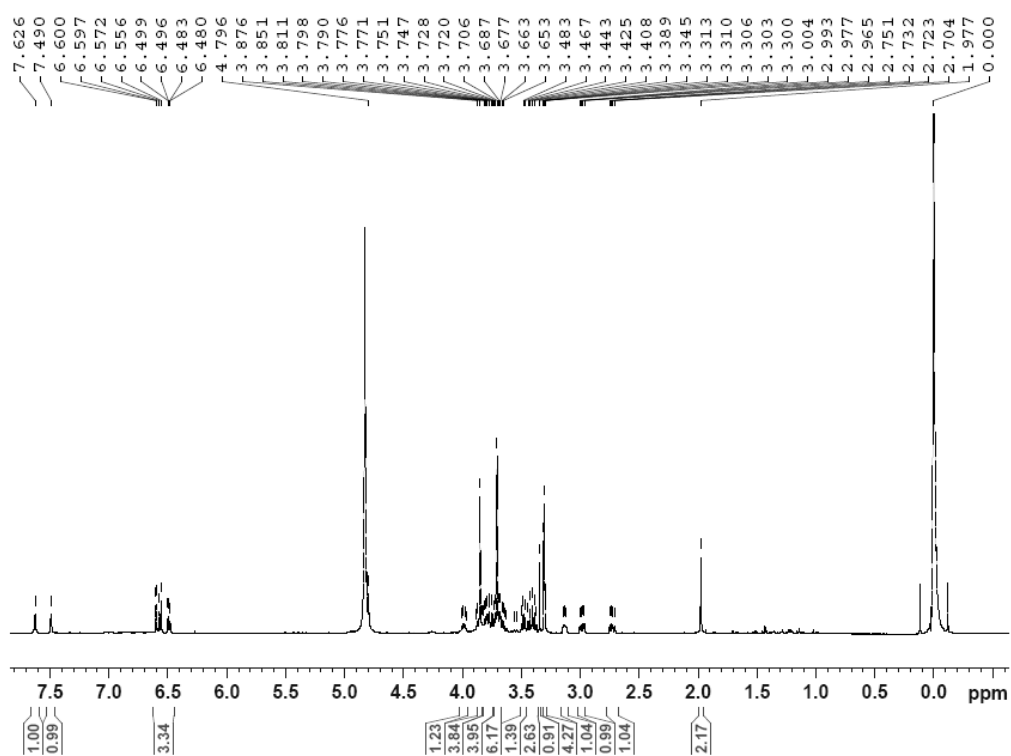

Figure S22  $^1\text{H}$  NMR (500 MHz,  $\text{CD}_3\text{OD}$ ) spectrum of compound 4

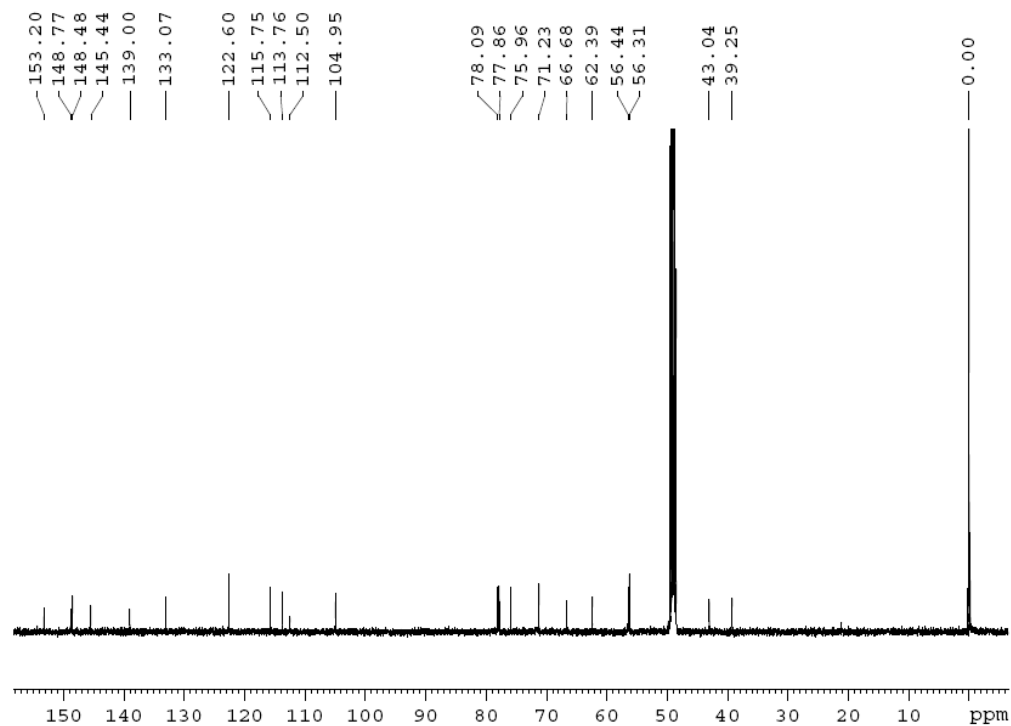

Figure S23  $^{13}\text{C}$  NMR (125 MHz,  $\text{CD}_3\text{OD}$ ) spectrum of compound 4

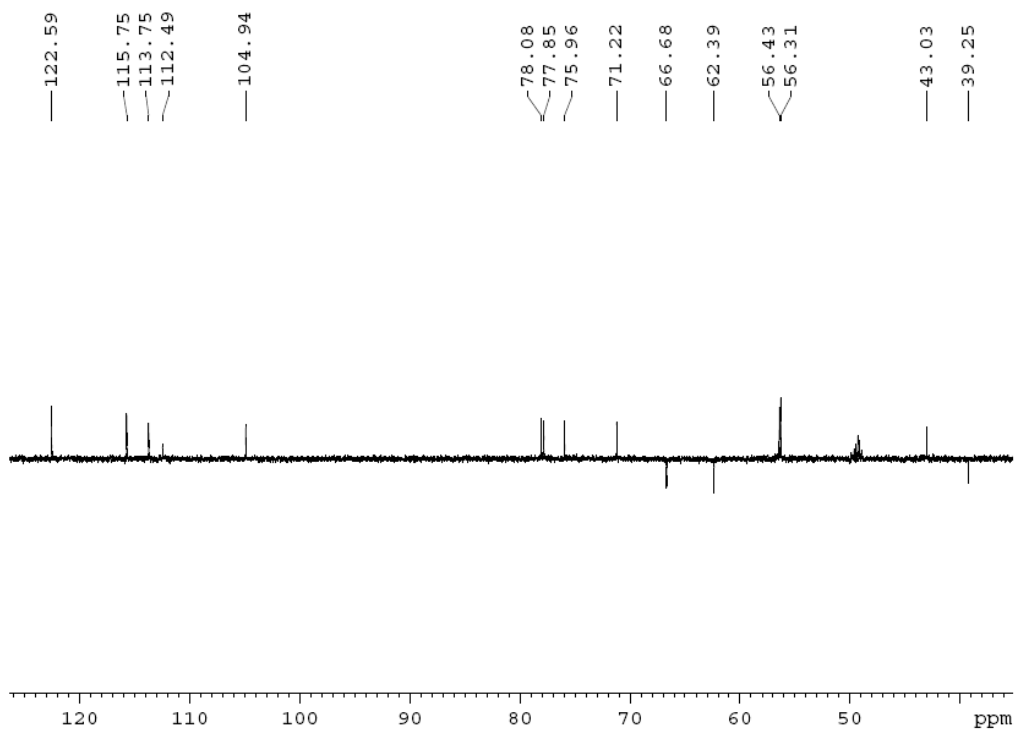

Figure S24 DEPT 135 (CD<sub>3</sub>OD) spectrum of compound 4

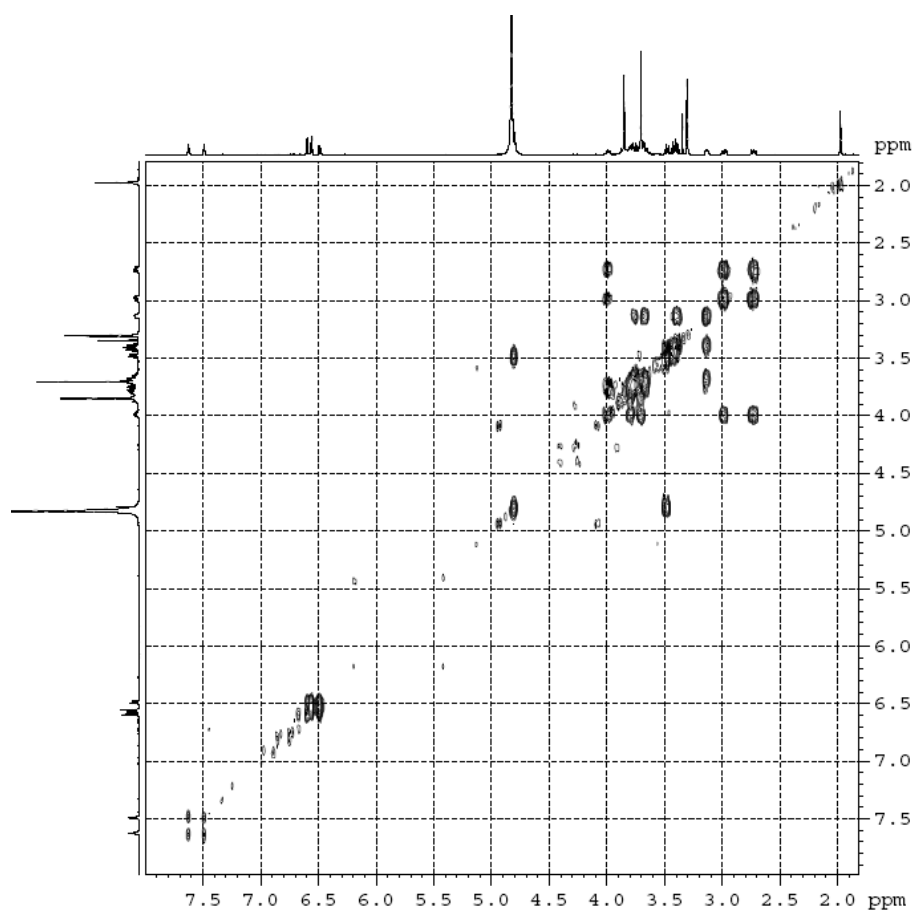



Figure S25  $^1\text{H}$   $^1\text{H}$  COSY ( $\text{CD}_3\text{OD}$ ) spectrum of compound 4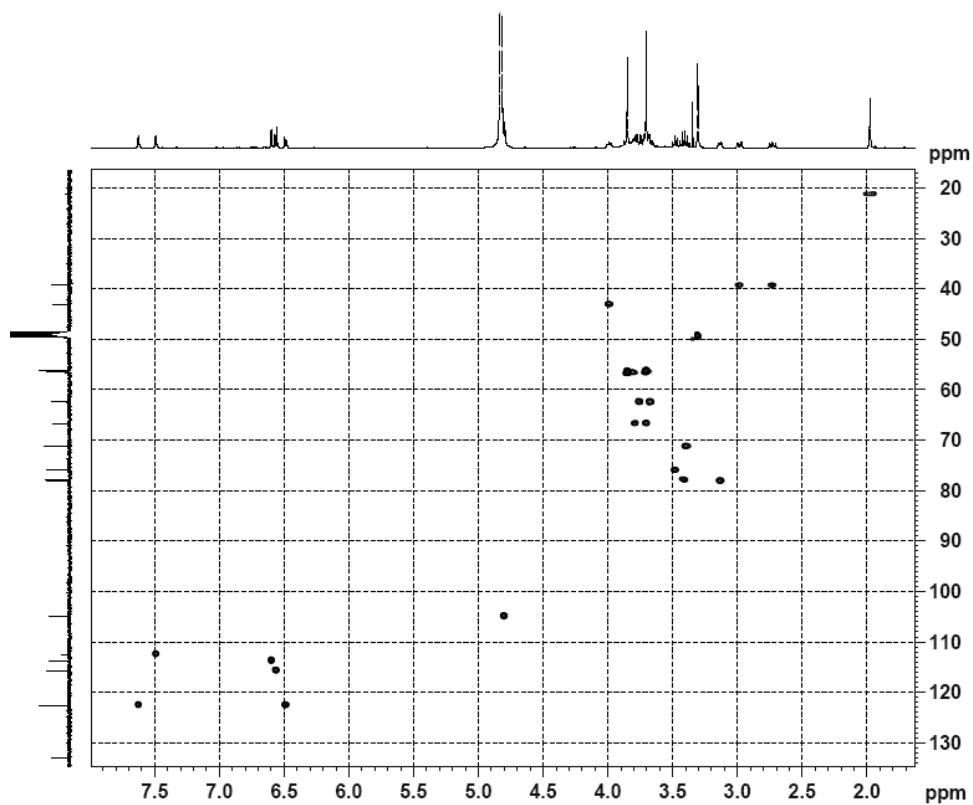Figure S26 HSQC ( $\text{CD}_3\text{OD}$ ) spectrum of compound 4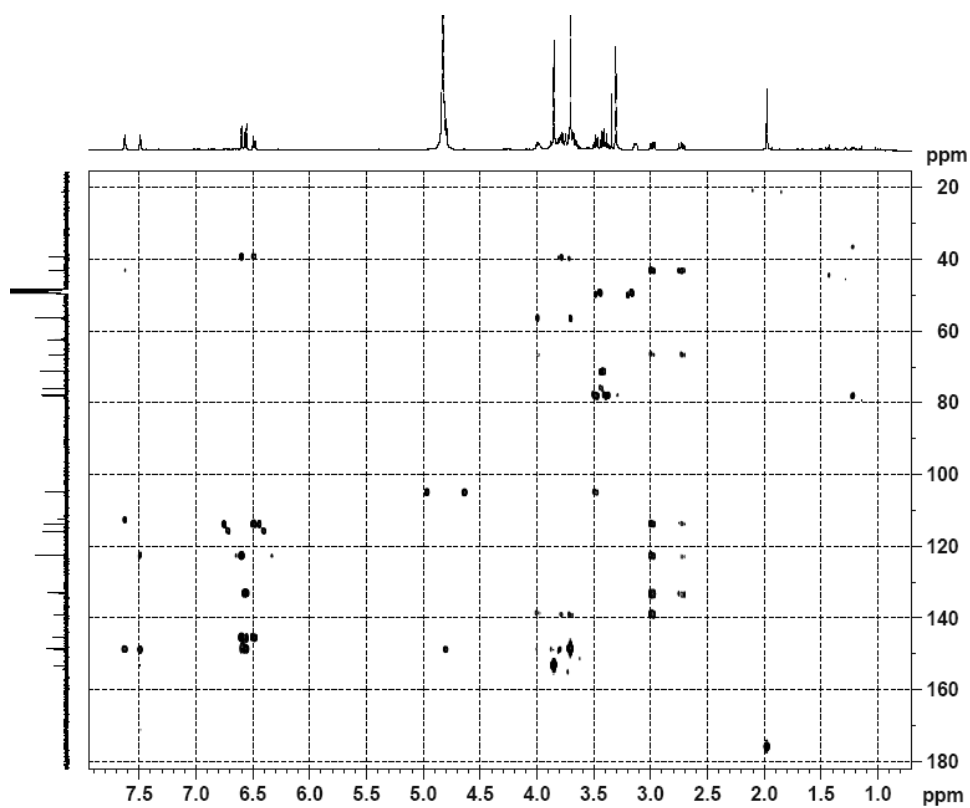

**Figure S27** HMBC (CD<sub>3</sub>OD) spectrum of compound 4

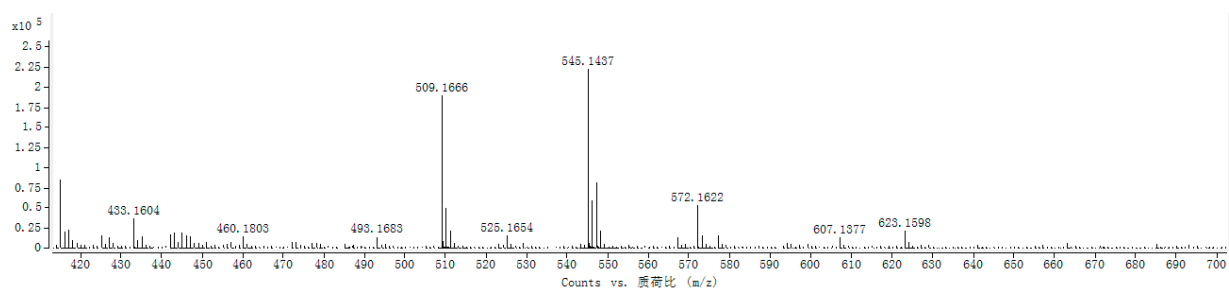

**Figure S28** HRESI-TOF-MS spectrum of compound 4

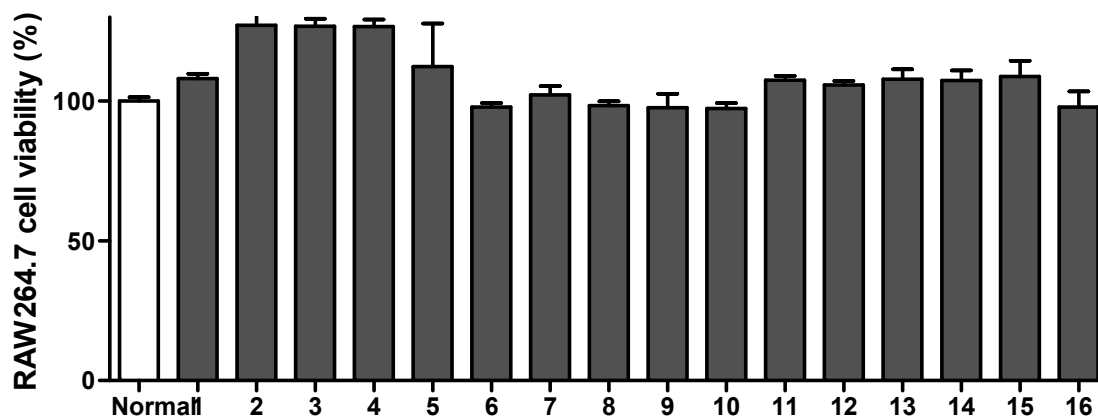

**Figure S29** MTT analysis of 1–16 obtained from *Cortex Dictamni* on RAW264.7 cells.

Normal: normal group without LPS and other tested samples. Values represent the mean  $\pm$  SD of four determinations. \*P < 0.05; \*\*P < 0.01; \*\*\*P < 0.001 (Differences between compound-treated group and normal group). N = 4. Final concentrations were 40 $\mu$ M for 1–16, respectively.

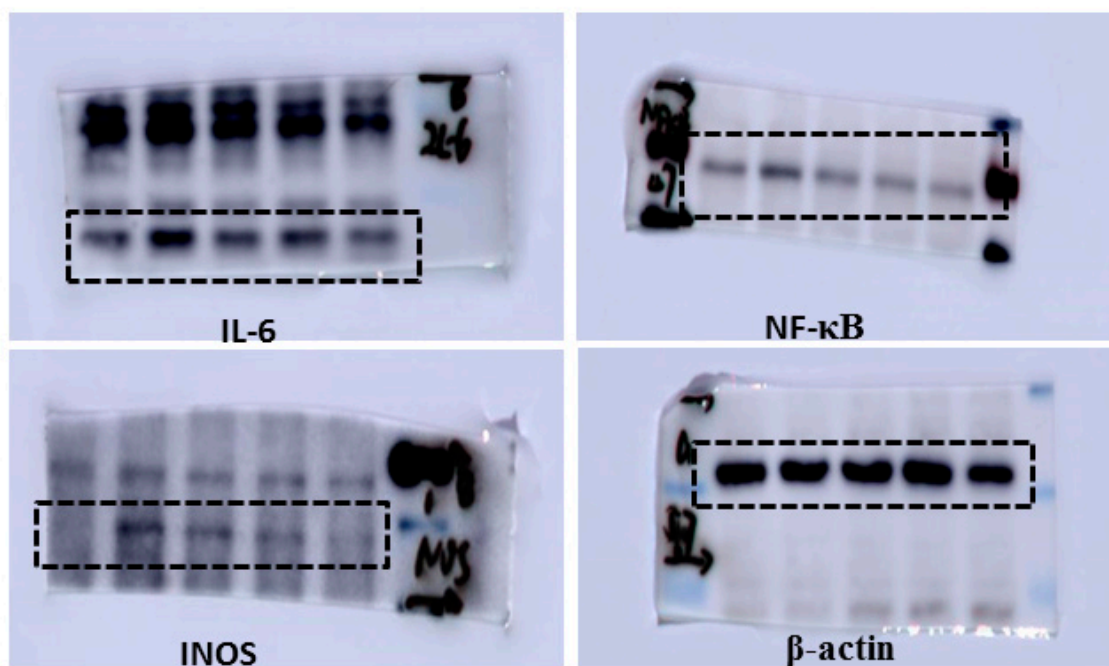

Figure S30 Raw quantification data for figure 6

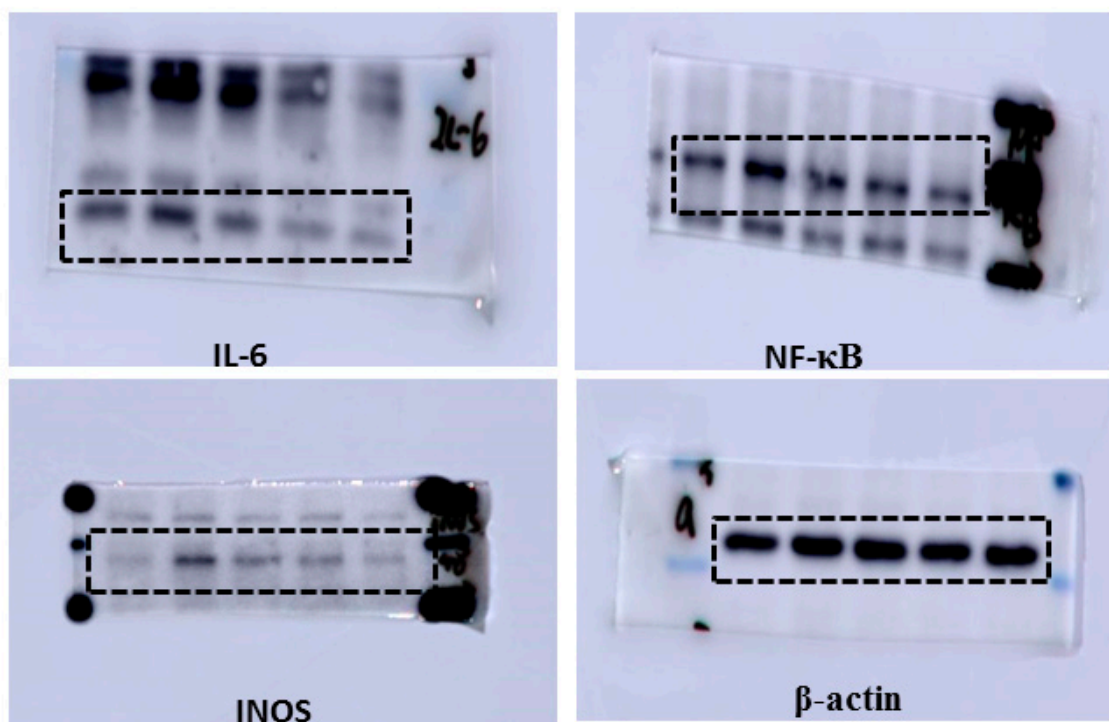

Figure S31 Raw quantification data for figure 7

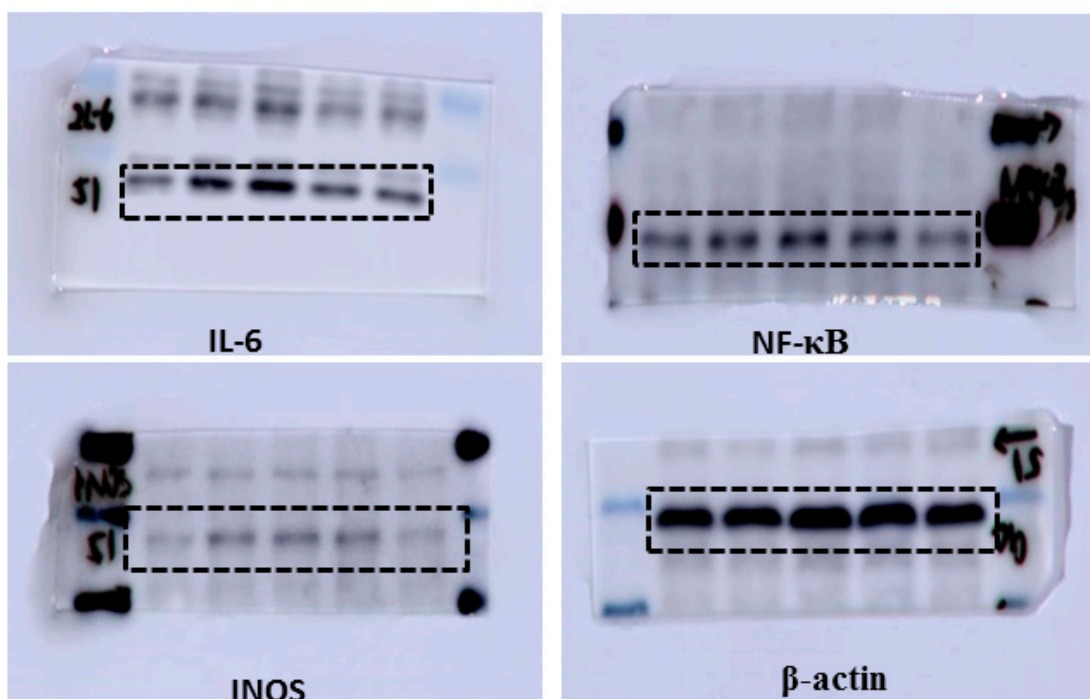

Figure S32 Raw quantification data for figure 8

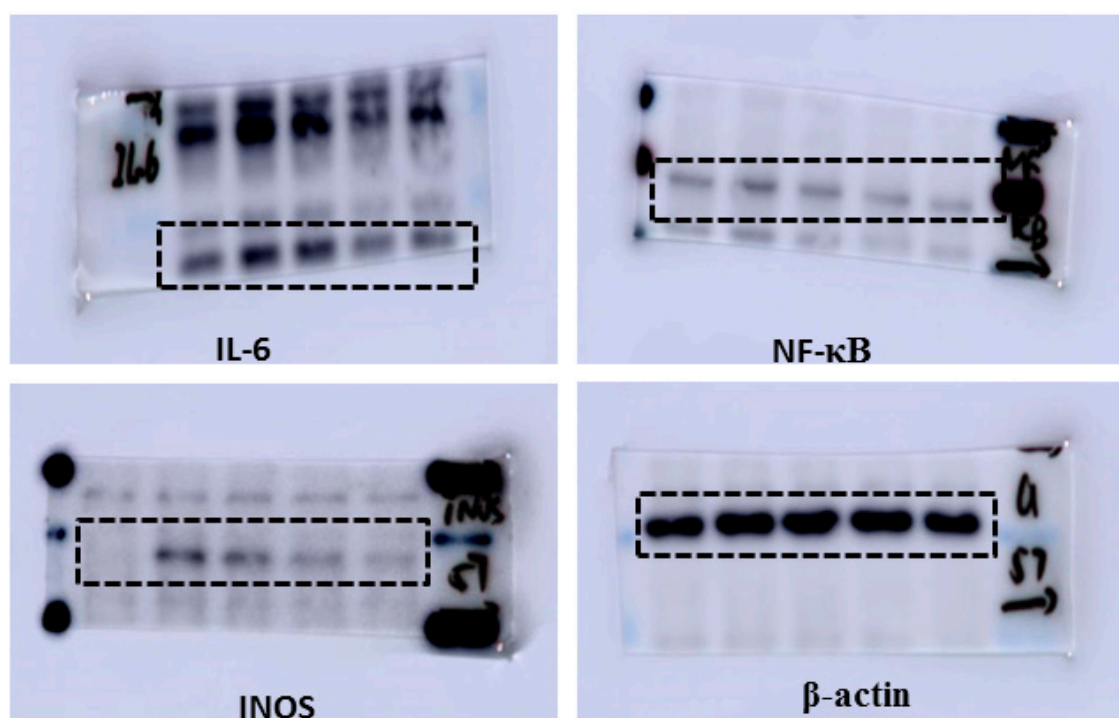

Figure S33 Raw quantification data for figure 9
